# Supplementary material for: Cofactor Metabolic Engineering of Escherichia coli for Aerobic L-Malate Production with Lower CO2 Emissions
Source: MDPI journal article supplement (doi:10.3390/bioengineering10080881), 2023-07-25
Supplement: s1 [file s1]

Table S1 Primers for *nuoA* knockout and identification

| Primers               | DNA Sequence ( 5'-3 ')                                    |
|-----------------------|-----------------------------------------------------------|
| Primers for knock out |                                                           |
| Target-S              | GATGACTAGTATTATACCTAGGACTGAG                              |
| Target <i>nuo-A</i>   | CTAGACTAGTCTGAAGTCATCGCTCATCACGTTTTAGAGCTAGAAATAG<br>CAAG |
| <i>nuo-5-S</i>        | GTCGGTGCTTTTTTTGAATTCATAAAGCAGATATTCCATGGCGAC             |
| <i>nuo-5-A</i>        | GATCTATGCGGGTGAGCGTATAATGTAGCAGGTGATTTTTTTCAGGC           |
| <i>nuo-3-S</i>        | GCCTGAAAAAATCACCTGCTACATTATACGCTCACCCGCATAGATC            |
| <i>nuo-3-A</i>        | CAGGTCGACTCTAGAGAATTCTAGATTCCTGCAACAGCATCAGTG             |
| <i>nuo-V-S</i>        | CCATCGTCCTTCAGCGTTTA                                      |
| <i>nuo-V-A</i>        | AGGTTAGTTACGGCAATGCGTTC                                   |

Table S2 Primers for construction of plasmid pTrc-*fxpk-fbp*

| Primers        | DNA Sequence ( 5'-3 ')                                    |
|----------------|-----------------------------------------------------------|
| <i>fxpk</i> -S | TTTCACACAGGAAACAGACCATGGAATTCATGACGAGTCCTGTTATT<br>GGCACC |
| <i>fxpk</i> -A | GCATGCCTGCAGGTCGACTCTAGACTCGTTATCGCCAGCGGTT               |
| <i>fbp</i> -S  | CCGCCGAACCGCTGGCGATAACGAGATGAAAACGTTAGGTGAATTT<br>ATTGTCG |
| <i>fbp</i> -A  | GCATGCCTGCAGGTCGACTCTAGATTACGCGTCCGGGAACTCA               |

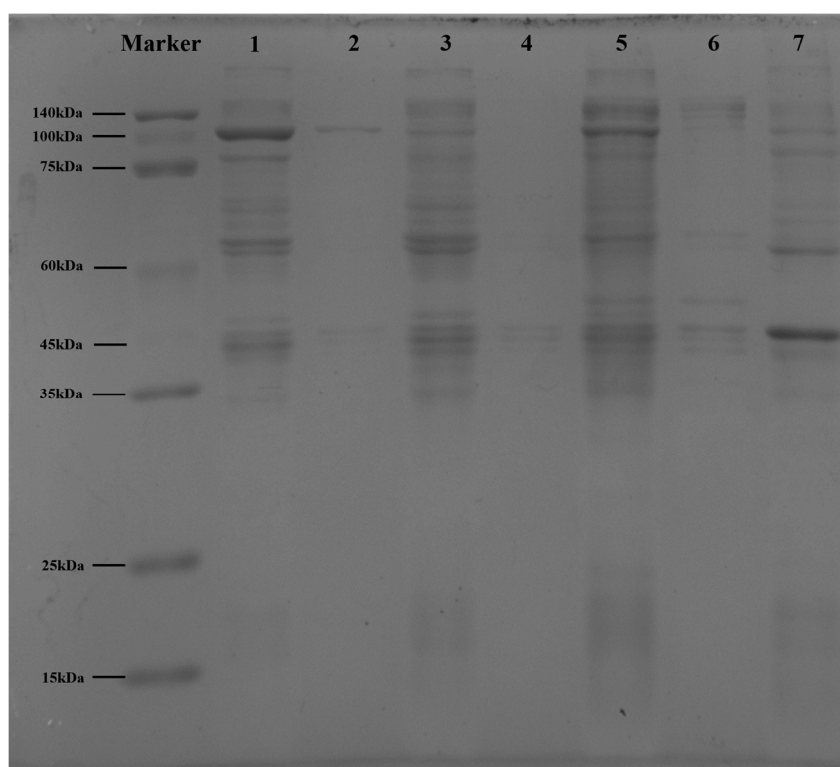

Figure S1 SDS-PAGE protein electrophoresis of recombinants of *E. coli* E23. Sample 1 and 2 are the supernatant and pellets of E23 (pTrc-*fxpk*). Sample 3 and 4 are the supernatant and pellets of E23 (pTrc99a). Sample 5 and 6 are the supernatant and pellets of E23 (pTrc-*fxpk-fbp*). Sample 7 is the supernatant of E23 (pTrc-*fbp*).
